# Supplementary material for: Creating Acceptable Tablets 3D (CAT 3D): A Feasibility Study to Evaluate the Acceptability of 3D Printed Tablets in Children and Young People
Source: MDPI journal article supplement (doi:10.3390/pharmaceutics14030516), 2022-02-25
Supplement: s1 [file s1]

Research paper

## **Creating Acceptable Tablets 3D (CAT 3D): A feasibility study to evaluate the mouthfeel of 3D printed tablets in children and young people.**

# **Supplementary Data**

Louise Bracken<sup>1</sup>, Rober Habashy<sup>2</sup>, Emma McDonough<sup>1</sup>, Fiona Wilson<sup>3</sup>, Joanne Shakeshaft<sup>1</sup>, Udeme Ohia<sup>3</sup>, Tamar Garcia-Sorribes<sup>2</sup>, Mohamed A Alhnan<sup>4,\*</sup>, Matthew Peak<sup>1, 3 \*\*</sup>

<sup>1</sup> Paediatric Medicines Research Unit, Alder Hey Children's NHS Foundation Trust, Liverpool, L12 2AP, UK.

<sup>2</sup> School of Medicine and Biomedical Science, University of Central Lancashire, Preston, PR1 2HE, UK.

<sup>3</sup> NIHR Alder Hey Clinical Research Facility, Alder Hey Children's NHS Foundation Trust, Liverpool, L12 2AP, UK.

<sup>4</sup> Centre for Pharmaceutical Medicine Research, School of Cancer & Pharmaceutical Science, King's College, London, SE1 9NH, UK.

\*Corresponding author:

**Dr Mohamed A Alhnan**

Centre for Pharmaceutical Medicine  
Research

Institute of Pharmaceutical Sciences

King's College London

150 Stamford Street

London SE1 9NH. Tel.: +44 (0)20 7848 726

Email: [Alhnan@kcl.ac.uk](mailto:Alhnan@kcl.ac.uk)

\*\*Corresponding author:

**Professor Matthew Peak**

Paediatric Medicines Research Unit

Alder Hey Children's NHS Foundation Trust

Liverpool

L12 2AP.

Email: [matthew.peak@alderhey.nhs.uk](mailto:matthew.peak@alderhey.nhs.uk)

## Hedonic Scale

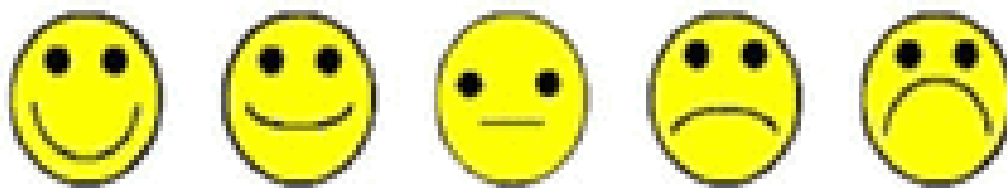

**Very Easy**

**Very Hard**

**Figure S1** Hedonic scale on which participants were asked to rate 3D printed tablets.

**Table S1** Summary of heavy metal assay of 3D printed tablets.

| Element                      | Cd        | Pb        | As        | Hg         | Co        | V    | Ni        | Cu        |
|------------------------------|-----------|-----------|-----------|------------|-----------|------|-----------|-----------|
| Limit ppm                    | 0.5       | 0.5       | 1.5       | 3          | 5         | 10   | 20        | 300       |
| Ammount (ppm)                | 0.33±0.21 | 0.68±0.56 | 0.72±0.27 | 0.03±0.023 | 0.24±0.07 | 0    | 0.16±0.08 | 1.12±0.35 |
| Amount in 10-mm tablet in µg | 0.11      | 0.23      | 0.25      | 0.01       | 0.08      | 0.00 | 0.05      | 0.40      |
| Amount in 8-mm tablet in µg  | 0.06      | 0.12      | 0.12      | 0.00       | 0.04      | 0.00 | 0.03      | 0.20      |
| Amount in 6-mm tablet in µg  | 0.03      | 0.06      | 0.06      | 0.00       | 0.02      | 0.00 | 0.01      | 0.10      |
